# Supplementary material for: Vascular Endothelial Growth Factor Receptor-2 Polymorphisms Have Protective Effect against the Development of Tendinopathy in Volleyball Athletes
Source: PLoS One. 2016 Dec 8;11(12):e0167717. doi: 10.1371/journal.pone.0167717 (PMC5145183; doi:10.1371/journal.pone.0167717)
Supplement: S1 Table — Demographic and clinical variables, and genotypes of VEGF and KDR in tendinopathy cases and controls. (XLSX) [file pone.0167717.s001.xlsx]

## Sheet: Data
ID	Age	Gender	Declared preference	Years of practice in volleyball	Function	Traumatic lesion	Pain in any joint	Away from training due to injury	Tendinopathy	VEGF 2578C>A (rs699947)	VEGF 460T>C (rs833061)	VEGF 405G>C (rs2010963)	VEGF 936C>T (rs3025039)	KDR 1719T>A (rs1870377)	KDR 1192G>A (rs2305948)	KDR 604C>T (rs2071559)
C001	18	F	Right	5	Setter	No	No	No	No	CC	TT	CC	CC	AA	GG	TC
C002	18	F	Right	9	Spiker	No	No	No	No	CA	TT	GG	CC	AA	GG	TC
C003	17	F	Right	6	Setter	No	No	No	Yes	CA	TC	GG	CC	TT	GG	TT
C004	17	F	Right	5	Spiker	No	Yes	No	No	CC	TT	CC	CC	TT	GG	TC
C005	19	F	Right	4	Spiker	No	Yes	Yes	Yes	CA	TC	GC	CC	TT	GG	CC
C006	18	F	Right	6	Setter	No	Yes	Yes	No	CA	TC	GG	CC	TT	GA	TC
C007	19	F	Right	5	Spiker	No	No	No	Yes	AA	CC	GG	CC	TT	GG	TT
C008	17	F	Right	4	Spiker	No	Yes	No	Yes	CA	TC	GC	CC	TT	GA	TC
C009	17	F	Right	4	Spiker	No	No	No	No	CC	TT	GC	CC	TT	GG	CC
C010	19	F	Right	6	Spiker	No	No	No	No	CC	TT	GG	CC	TT	GG	TC
C011	19	F	Right	6	Spiker	No	No	No	No	CA	TC	GC	CC	TA	GA	CC
C012	17	F	Right	4	Setter	No	Yes	No	No	CA	TC	GG	CC	TT	GG	CC
C013	19	F	Right	8	Spiker	No	Yes	No	Yes	CC	CC	GC	CC	TA	GG	TT
C014	16	F	Right	3	Spiker	No	Yes	No	No	CC	TT	GC	CT	TT	AA	CC
C015	17	F	Right	5	Spiker	No	Yes	No	Yes	CA	TC	GC	CC	AA	GG	TC
C016	17	F	Right	3	Spiker	No	Yes	No	Yes	CA	TC	GC	CC	TT	GG	TC
C017	17	F	Right	7	Spiker	No	No	No	No	AA	CC	GG	TT	TT	GA	TC
C018	17	F	Right	6	Spiker	No	No	No	Yes	AA	CC	GG	CC	TT	GG	CC
C019	19	F	Right	7	Spiker	Yes	Yes	No	Yes	CA	TC	GC	CC	TA	GG	TC
C020	17	F	Right	4	Spiker	No	Yes	Yes	No	CA	TC	GG	CC	AA	GG	CC
C021	17	F	Right	5	Spiker	No	No	No	No	CC	TT	CC	CC	TT	GA	TC
C022	19	F	Right	7	Spiker	Yes	Yes	Yes	Yes	CA	TC	GC	CT	TT	GG	CC
C023	17	F	Right	5	Spiker	No	Yes	No	No	CA	TC	GC	CC	TT	GG	CC
C024	19	F	Right	5	Setter	Yes	No	No	Yes	CA	TT	GG	CC	TT	GG	CC
C025	18	M	Right	8	Spiker	No	Yes	No	No	CA	TC	GC	CT	TT	GG	TC
C026	18	M	Right	3	Spiker	No	Yes	No	Yes	CA	TC	GC	CC	TA	GA	TT
C027	18	M	Right	9	Spiker	No	Yes	No	Yes	CC	TT	GC	CC	TA	GA	CC
C028	18	M	Right	7	Spiker	No	No	No	No	CA	TC	GC	CC	AA	GG	TC
C029	18	M	Right	4	Spiker	Yes	Yes	No	Yes	CA	TC	GG	CT	TT	GG	TT
C030	18	M	Left	7	Spiker	No	No	No	No	AA	CC	GG	CC	TT	GG	TC
C031	18	M	Right	2	Spiker	Yes	Yes	Yes	No	CA	TC	GG	CC	TT	GG	TC
C032	18	M	Right	5	Spiker	Yes	Yes	Yes	No	CC	TT	GG	CC	TA	GA	TT
C033	18	M	Right	3	Spiker	No	No	No	No	CC	TT	GG	CC	TA	GG	TC
C034	17	M	Right	3	Spiker	No	No	No	No	CC	TT	CC	CC	TT	GA	TC
C035	17	M	Right	5	Spiker	No	No	No	No	CC	TT	GC	CC	TA	GG	TC
C036	18	M	Right	11	Libero	No	Yes	No	No	CA	TC	GC	CC	TT	GG	CC
C037	18	M	Right	2	Spiker	No	No	No	No	CA	TC	GG	CC	AA	GA	TT
C038	17	M	Right	3	Spiker	No	Yes	Yes	Yes	CC	TT	GC	CC	TT	GG	CC
C039	18	M	Right	3	Spiker	No	Yes	No	No	CC	TT	CC	CC	TT	GG	CC
C040	18	M	Right	6	Spiker	No	Yes	Yes	Yes	CC	TT	GC	CC	TA	GG	TT
C041	18	M	Right	3	Spiker	No	Yes	No	Yes	CA	TC	GC	CC	TA	GA	TC
C042	18	M	Right	8	Spiker	No	Yes	No	No	CA	TC	GC	CT	TA	GG	TC
C043	18	M	Right	3	Spiker	No	No	No	No	CA	TC	GC	CT	TT	GG	TC
C044	18	M	Right	2	Spiker	No	No	No	No	CC	TT	GC	CC	TT	GG	TC
C045	17	M	Right	8	Setter	No	Yes	Yes	No	CC	TT	CC	CC	TA	GG	TC
C046	18	M	Right	10	Setter	No	Yes	No	No	CA	TC	GG	CC	TT	GG	CC
C047	17	M	Right	5	Setter	No	No	No	No	CA	TC	GG	CC	TA	GA	TC
C048	17	M	Right	7	Setter	No	No	No	Yes	CC	TT	CC	CC	TA	GG	TC
C049	17	M	Left	7	Spiker	No	Yes	Yes	No	AA	CC	GG	CT	TT	GG	TT
C050	17	F	Right	10	Spiker	No	Yes	No	No	CC	TT	GG	CC	TT	GG	TC
C051	18	M	Right	4	Spiker	Yes	Yes	Yes	No	CA	TC	GG	CC	TA	GG	TT
C052	20	M	Right	2	Spiker	Yes	No	No	Yes	CC	TC	GC	CC	TT	GG	CC
C053	22	M	Right	4	Spiker	Yes	Yes	No	No	CC	TT	GC	CC	TT	GA	TC
C054	31	F	Right	16	Spiker	Yes	Yes	No	No	CC	CC	GG	CC	TT	GA	TC
C055	30	F	Right	12	Spiker	Yes	No	No	Yes	CC	TT	GG	CC	TA	GG	TC
C056	29	M	Right	12	Spiker	Yes	Yes	No	No	CA	TC	GC	CC	TT	GA	TC
C057	28	F	Right	15	Spiker	Yes	Yes	No	Yes	CC	TT	CC	CC	TT	GG	TT
C058	26	F	Right	14	Spiker	Yes	Yes	Yes	No	CC	TT	CC	CT	TA	GG	CC
C059	20	M	Right	4	Libero	No	Yes	Yes	No	CA	TC	GG	CC	TT	GG	TC
C060	22	F	Right	9	Setter	Yes	Yes	No	Yes	CC	TT	GG	CT	TT	GG	TC
C061	33	M	Right	15	Spiker	Yes	Yes	No	No	CA	TC	GC	TT	TA	GA	TC
C062	29	M	Right	14	Setter	Yes	Yes	No	Yes	CC	TT	GC	CT	AA	GG	TT
C063	23	M	Right	9	Spiker	No	Yes	No	No	CC	TT	GG	CC	TT	GA	CC
C064	26	F	Right	15	Spiker	No	Yes	Yes	No	CA	TC	GC	CC	TA	GG	TC
C065	27	F	Right	12	Setter	No	Yes	No	No	AA	CC	GG	CT	AA	GA	TT
C066	30	F	Right	14	Libero	Yes	Yes	No	No	AA	CC	GG	CT	TA	GG	TC
C067	32	F	Right	19	Spiker	No	Yes	Yes	No	CA	TC	GC	CC	TA	GG	TC
C068	24	F	Right	8	Spiker	Yes	Yes	No	Yes	CC	TT	CC	CC	TA	GA	TC
C069	21	F	Right	5	Spiker	No	Yes	Yes	Yes	CA	TC	GC	CC	AA	GA	CC
C070	26	F	Right	13	Spiker	Yes	Yes	Yes	Yes	CC	TT	GC	CC	TA	GA	CC
C071	20	M	Right	9	Spiker	No	Yes	No	Yes	CA	TC	GC	CC	TT	GG	TC
C072	20	M	Right	7	Spiker	Yes	Yes	No	No	CA	TC	GG	CC	TA	GG	CC
C073	19	M	Right	8	Setter	No	No	No	No	CA	TC	GC	CC	TT	GG	TC
C074	19	M	Right	5	Spiker	Yes	Yes	Yes	Yes	CA	CC	GG	CC	TT	GG	TC
C075	20	M	Right	7	Setter	No	No	No	No	CA	TC	GC	CC	TA	GA	TT
C076	20	M	Right	6	Libero	No	No	No	No	CA	CC	GG	CC	TA	GA	TT
C077	20	M	Right	5	Spiker	Yes	Yes	Yes	No	CC	TT	CC	CT	TT	GG	CC
C078	20	M	Right	3	Spiker	No	No	No	No	CC	TT	GC	CC	TA	GG	TT
C079	20	M	Right	2	Spiker	No	Yes	No	No	CC	TT	GC	CC	TT	GA	CC
C080	29	M	Right	15	Spiker	No	Yes	No	No	CA	TC	GC	CC	TA	GA	CC
C081	36	M	Right	22	Setter	No	No	No	No	CC	TT	GC	CC	TT	GA	CC
C082	32	M	Right	15	Spiker	No	Yes	Yes	No	CA	TC	CC	CC	TA	GG	TC
C083	19	M	Right	4	Spiker	No	Yes	Yes	No	CA	TC	GC	CC	TT	GA	TC
C084	20	M	Right	11	Spiker	No	Yes	Yes	Yes	CC	TT	GG	CC	TT	GG	CC
C085	19	M	Right	2	Spiker	No	Yes	No	No	CC	TC	GG	CC	TA	AA	CC
C086	18	M	Right	3	Spiker	No	No	No	No	CC	TT	GC	CC	TT	GG	TC
C087	19	M	Right	6	Setter	Yes	Yes	No	No	CC	TT	99	CT	TT	GG	CC
C088	20	M	Right	8	Spiker	No	Yes	Yes	No	CC	TT	GC	99	TA	GG	TT
C089	15	F	Right	6	Setter	Yes	No	No	No	CC	TC	GC	CC	AA	GG	CC
C090	14	F	Right	2	Spiker	No	No	No	No	CA	TC	GG	CC	TA	GG	CC
C091	15	F	Right	5	Spiker	Yes	Yes	Yes	No	CC	TT	GG	CC	TT	GG	CC
C092	15	F	Right	4	Spiker	Yes	Yes	No	No	CC	TT	GG	CC	TT	GG	CC
C093	15	F	Right	4	Libero	No	Yes	Yes	No	CC	TT	CC	CC	TA	GG	TC
C094	14	F	Right	3	Spiker	No	Yes	No	No	CA	TC	GG	CT	TT	GG	TC
C095	13	F	Right	3	Spiker	No	Yes	No	Yes	CA	TT	99	TT	TT	GG	CC
C096	15	F	Right	2	Spiker	No	Yes	Yes	No	CA	TC	99	CC	TT	GG	TC
C097	15	F	Right	8	Setter	Yes	Yes	Yes	No	CA	TC	99	CC	TA	GG	TC
C098	15	F	Right	3	Spiker	No	No	No	No	CA	TC	99	CT	AA	GA	TT
C099	14	F	Right	3	Spiker	No	No	No	No	CA	TC	99	CT	99	GG	TC
C100	14	F	Right	2	Spiker	No	Yes	Yes	No	CC	TT	99	CC	TT	GG	CC
C101	14	F	Right	4	Spiker	No	Yes	Yes	No	AA	CC	99	CC	TT	GA	TT
C102	16	M	Right	1	Spiker	No	Yes	Yes	Yes	CC	TT	99	CC	TA	GG	CC
C103	30	F	Right	14	Spiker	No	Yes	Yes	No	CC	TT	99	CC	TT	GA	TT
C104	26	F	Right	15	Libero	No	No	No	Yes	CA	TC	99	CC	TT	GG	TC
C105	29	F	Right	16	Spiker	Yes	Yes	No	No	CA	TC	99	CT	TA	GG	TC
C106	32	F	Right	17	Setter	Yes	Yes	No	No	CA	TC	99	CC	TA	GG	TT
C107	28	F	Right	13	Spiker	No	Yes	Yes	Yes	CC	TT	99	CC	TT	GA	TC
C108	32	F	Right	17	Spiker	Yes	No	No	No	CA	TC	99	CC	TT	GG	CC
C109	30	F	Right	16	Setter	No	Yes	Yes	Yes	CA	TC	99	CC	TA	GG	TT
C110	28	F	Right	16	Spiker	Yes	Yes	Yes	No	CC	TT	99	CC	TA	GG	TC
C111	21	F	Right	7	Spiker	Yes	Yes	Yes	No	CA	TC	99	CC	TA	GA	TC
C112	21	F	Right	9	Libero	Yes	Yes	Yes	No	CC	TT	99	CC	TA	GA	TC
C113	22	F	Right	9	Spiker	Yes	Yes	No	No	CA	TC	99	CT	TA	GG	TC
C114	21	F	Right	5	Spiker	Yes	Yes	Yes	No	CC	TC	99	CT	TA	GA	CC
C115	21	F	Right	10	Libero	Yes	No	No	Yes	CC	TT	99	CT	TT	GG	CC
C116	22	F	Right	7	Spiker	No	Yes	No	Yes	CC	TT	99	CC	TA	GA	TC
C117	21	F	Right	10	Spiker	Yes	Yes	Yes	No	AA	CC	99	CT	TA	GG	CC
C118	22	F	Right	6	Spiker	Yes	Yes	No	No	CA	TC	99	CC	TA	GG	TC
C119	21	F	Right	12	Spiker	No	Yes	Yes	Yes	CA	TC	99	CC	TA	GA	CC
C120	21	F	Right	15	Setter	No	No	No	No	CA	TC	99	CC	TA	GG	CC
C121	21	F	Right	11	Spiker	Yes	Yes	Yes	Yes	CC	TC	99	CT	TA	AA	CC
C122	21	F	Right	5	Spiker	No	Yes	Yes	Yes	CC	TC	99	CC	TA	GG	TC
C123	20	F	Right	6	Spiker	No	No	No	No	CC	TT	99	CC	TA	GG	TC
C124	21	F	Right	9	Spiker	Yes	Yes	No	Yes	CC	TT	99	CC	TA	AA	CC
C125	21	F	Right	8	Spiker	No	No	No	No	CA	TT	99	CT	TA	GA	TC
C126	21	F	Right	7	Spiker	Yes	Yes	No	No	CA	TT	99	CT	TA	GA	TC
C127	20	F	Right	13	Setter	No	Yes	No	No	CA	TC	99	CT	TA	GG	TT
C128	18	F	Right	4	Spiker	Yes	Yes	No	No	CA	TC	99	CC	TA	GG	TC
C129	18	F	Right	5	Spiker	Yes	Yes	No	No	CA	TC	99	CC	99	GG	CC
C130	19	F	Left	9	Spiker	Yes	Yes	No	No	CA	TC	99	CC	TT	GA	TC
C131	19	F	Right	7	Spiker	Yes	No	No	No	CA	TC	99	CT	TA	GA	TC
C132	19	F	Right	7	Spiker	Yes	Yes	No	Yes	CC	TT	99	CC	AA	GG	TT
C133	19	F	Right	4	Spiker	No	Yes	Yes	Yes	AA	CC	99	CC	TA	GG	TC
V001	29	M	Right	13	Spiker	No	Yes	Yes	Yes	CA	TC	99	CC	TA	GG	TC
V002	26	M	Right	9	Spiker	Yes	Yes	Yes	Yes	CA	TC	99	CC	TT	GG	CC
V003	28	M	Right	14	Spiker	Yes	Yes	No	Yes	CC	TT	99	CC	TT	GG	TT
V004	27	M	Right	12	Spiker	No	Yes	Yes	Yes	CC	TT	99	CC	TT	GG	TT
V005	20	M	Right	6	Spiker	No	Yes	Yes	Yes	CC	TT	99	CC	99	GA	CC
V006	27	M	Right	15	Setter	No	Yes	No	Yes	CA	TC	99	CT	TT	GG	TC
V007	23	M	Right	15	Spiker	Yes	Yes	Yes	Yes	CA	TC	99	CT	TA	GG	TT
V008	25	M	Right	7	Spiker	No	Yes	No	Yes	CA	TC	99	CC	TT	GG	TC
V009	28	M	Right	15	Spiker	No	Yes	No	Yes	CA	TC	99	CT	TA	GG	CC
V010	25	M	Right	12	Spiker	No	Yes	No	Yes	CC	TT	99	CC	TT	GG	TC
V011	30	M	Right	12	Spiker	No	Yes	Yes	Yes	CA	TC	99	CC	99	GG	CC
V012	28	M	Right	14	Spiker	No	Yes	Yes	Yes	AA	CC	99	CC	TA	GA	TC
V013	24	M	Right	9	Spiker	No	Yes	Yes	Yes	CC	TC	99	CC	99	GG	CC
V014	29	M	Right	13	Spiker	No	Yes	No	Yes	CC	TC	99	CT	99	GG	TC
V015	22	M	Right	9	Spiker	No	Yes	No	Yes	CA	TC	99	CC	TT	GG	TC
V016	29	M	Right	10	Spiker	No	No	No	Yes	CC	TT	99	CC	TA	GG	TT
V017	25	M	Right	10	Spiker	No	Yes	No	Yes	AA	CC	99	CC	TT	GG	TC
V018	22	M	Right	6	Spiker	Yes	Yes	Yes	Yes	CA	TC	99	CC	TT	GG	TC
V019	27	M	Right	12	Libero	No	Yes	No	Yes	CA	TC	99	CC	TT	GG	TC
V020	23	M	Right	13	Setter	No	Yes	Yes	Yes	CC	TT	99	CC	TA	GA	TT
V021	26	M	Right	11	Setter	No	Yes	Yes	Yes	CC	TT	99	CT	AA	GG	TC
V022	26	M	Right	15	Spiker	No	Yes	No	Yes	CA	TC	99	CC	AA	GG	TT
V023	26	M	Right	9	Spiker	Yes	Yes	Yes	Yes	CA	TC	99	CC	TT	GG	TC
V024	26	M	Right	11	Spiker	No	Yes	Yes	Yes	CA	TC	99	CT	TT	GG	TC
V025	26	M	Right	12	Libero	No	No	No	Yes	CA	TC	99	CT	TT	GG	TC
V026	24	M	Right	8	Spiker	No	Yes	Yes	Yes	CA	TC	99	CC	TT	GA	TT
V027	26	M	Right	7	Spiker	Yes	Yes	No	Yes	CA	TC	99	CT	AA	GA	TC
V028	22	M	Right	7	Setter	No	Yes	No	Yes	CC	TT	99	CC	TT	GG	TT
V029	25	M	Right	12	Spiker	Yes	Yes	Yes	Yes	AA	CC	99	CT	TT	GG	CC
V030	22	M	Left	10	Spiker	No	Yes	Yes	Yes	AA	CC	99	CC	TT	GG	TT
V031	23	M	Right	11	Spiker	No	Yes	Yes	Yes	AA	CC	99	CT	TA	GG	TT
V032	27	M	Right	14	Setter	Yes	Yes	No	Yes	CA	TC	99	CC	TT	GG	TC
V033	22	M	Right	9	Spiker	No	Yes	No	Yes	CA	TC	99	CC	TT	GG	TC
V034	22	M	Right	7	Spiker	No	Yes	No	Yes	CA	TC	99	CT	99	AA	CC
V035	26	M	Right	10	Spiker	Yes	Yes	Yes	Yes	CA	TC	99	CC	TT	GG	CC
V036	26	M	Right	7	Spiker	Yes	No	No	Yes	CA	TC	99	TT	TA	GG	TC
V037	25	M	Left	12	Spiker	Yes	Yes	Yes	Yes	CC	TT	99	CC	TA	GG	TT
V038	28	M	Right	15	Libero	No	Yes	No	Yes	CA	TC	99	CC	TT	GA	TT
V039	22	M	Right	8	Spiker	No	Yes	Yes	Yes	CC	TT	99	CC	TT	GG	TC
V040	26	M	Right	9	Spiker	Yes	Yes	No	Yes	CC	TT	99	CC	TT	GG	TT
V041	26	M	Right	10	Spiker	Yes	Yes	Yes	Yes	CC	TT	99	CC	TT	GG	TT
V042	27	M	Right	9	Spiker	No	Yes	No	Yes	CC	99	99	CC	TA	GG	CC
V043	22	M	Right	9	Spiker	No	Yes	Yes	Yes	CC	TT	99	CC	TA	GG	TT
V044	26	M	Right	11	Spiker	No	Yes	Yes	Yes	CA	TC	99	CC	TA	GA	CC
V045	21	M	Right	7	Setter	No	Yes	Yes	Yes	CA	TC	99	CC	TT	GG	TC
V046	27	M	Right	7	Spiker	Yes	Yes	No	Yes	CA	TC	99	CC	TT	GA	TC
